# Supplementary material for: Analysis of Human and Mouse Reprogramming of Somatic Cells to Induced Pluripotent Stem Cells. What Is in the Plate?
Source: PubMed Central journal article supplement (PMC2941458; doi:10.1371/journal.pone.0012664), 2010-09-17

**Figure S4. Principal component analyses of Human and Mouse reprogramming datasets show that ESCs and iPSCs usually cluster together, far from the starting somatic cell population.**

Principal component analysis of genome-wide intensity values (or log of intensity gcRNA-normalized) (A) Human datasets (B) Mouse datasets

**A- Human datasets**

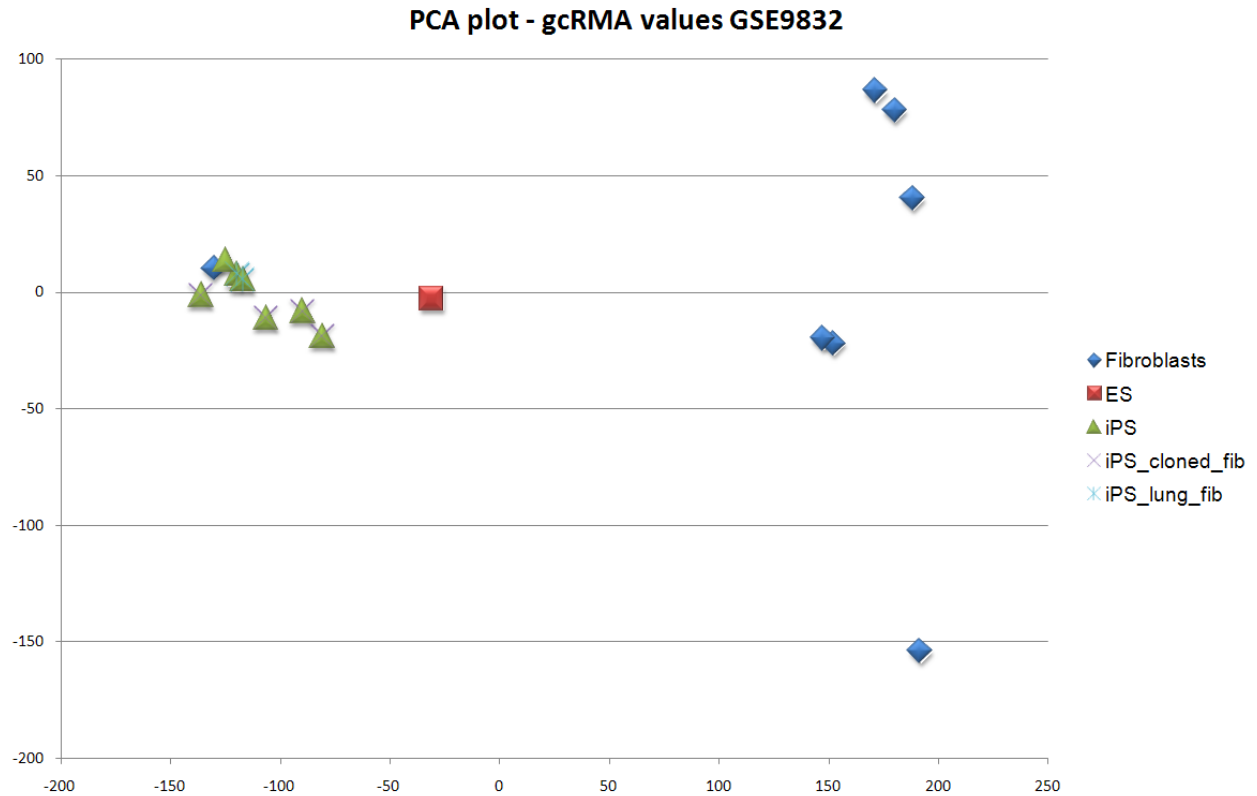

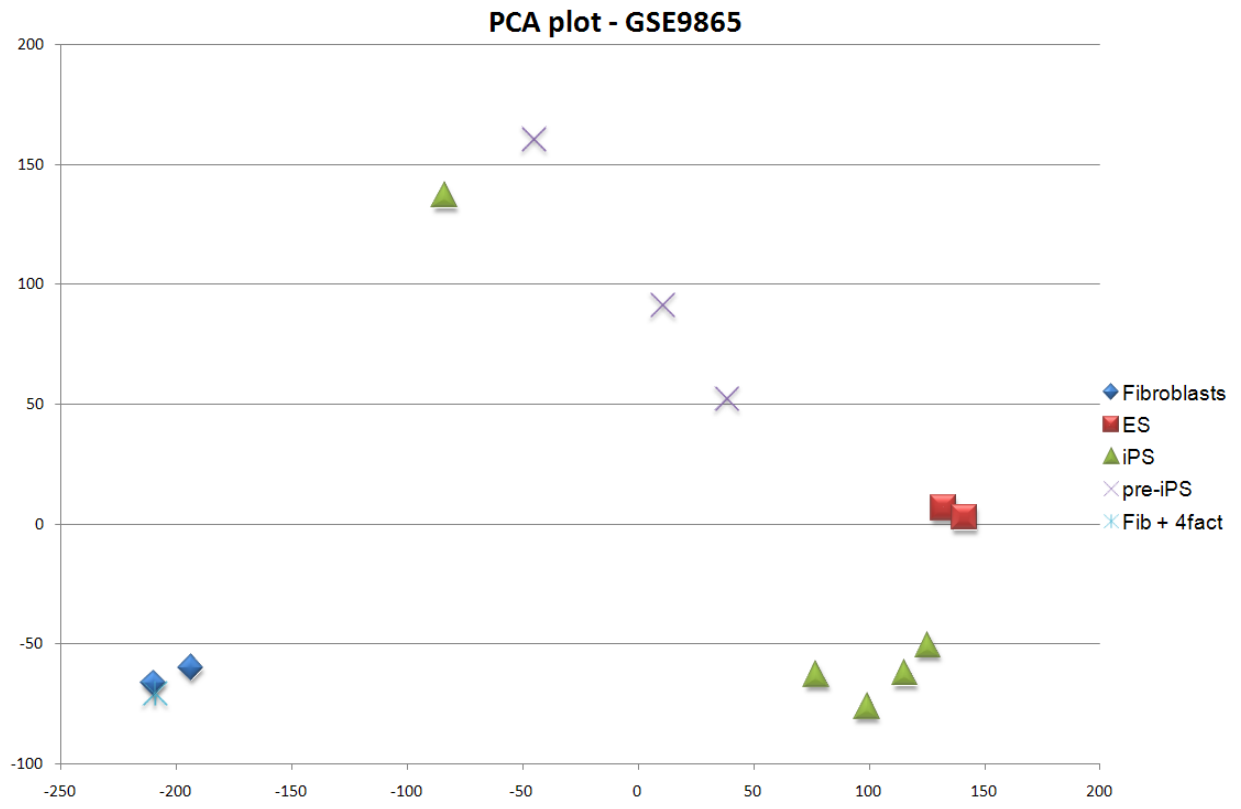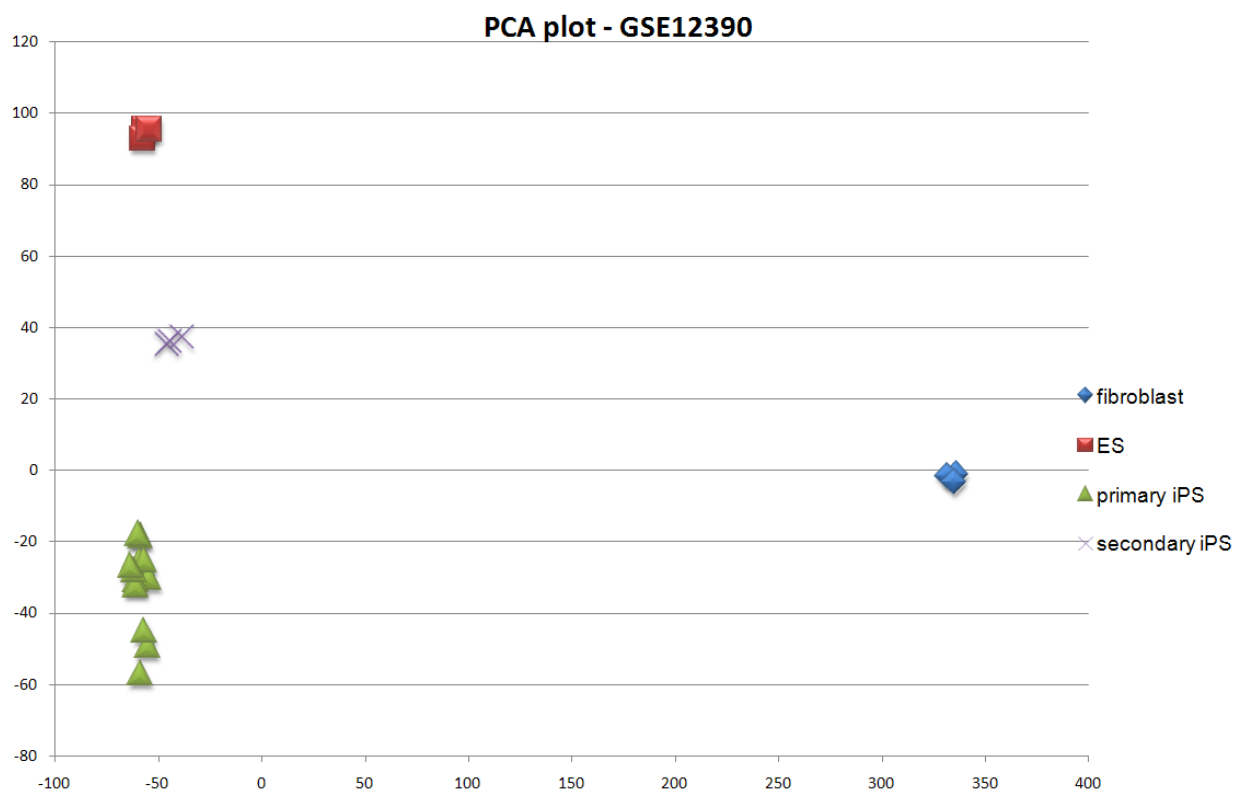

PCA plot - GSE14711

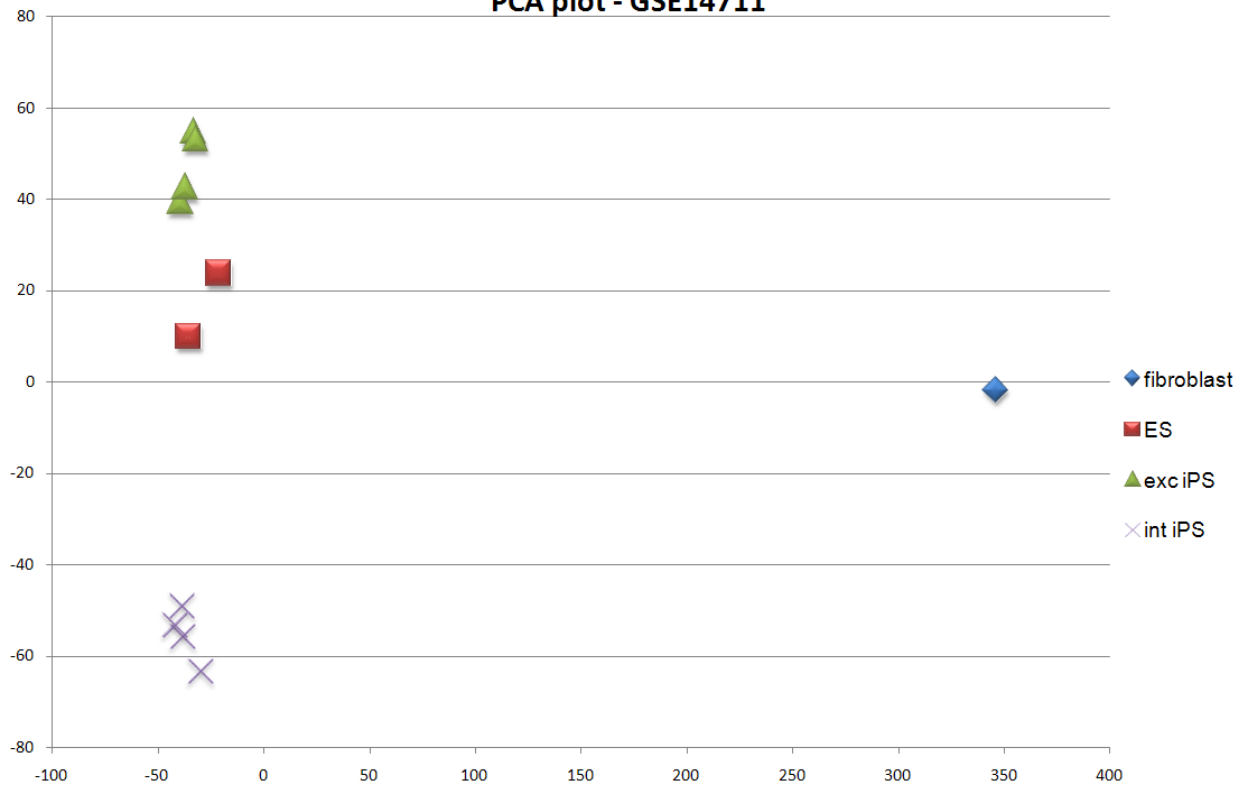

PCA plot - Melton (Huangfu et al.)

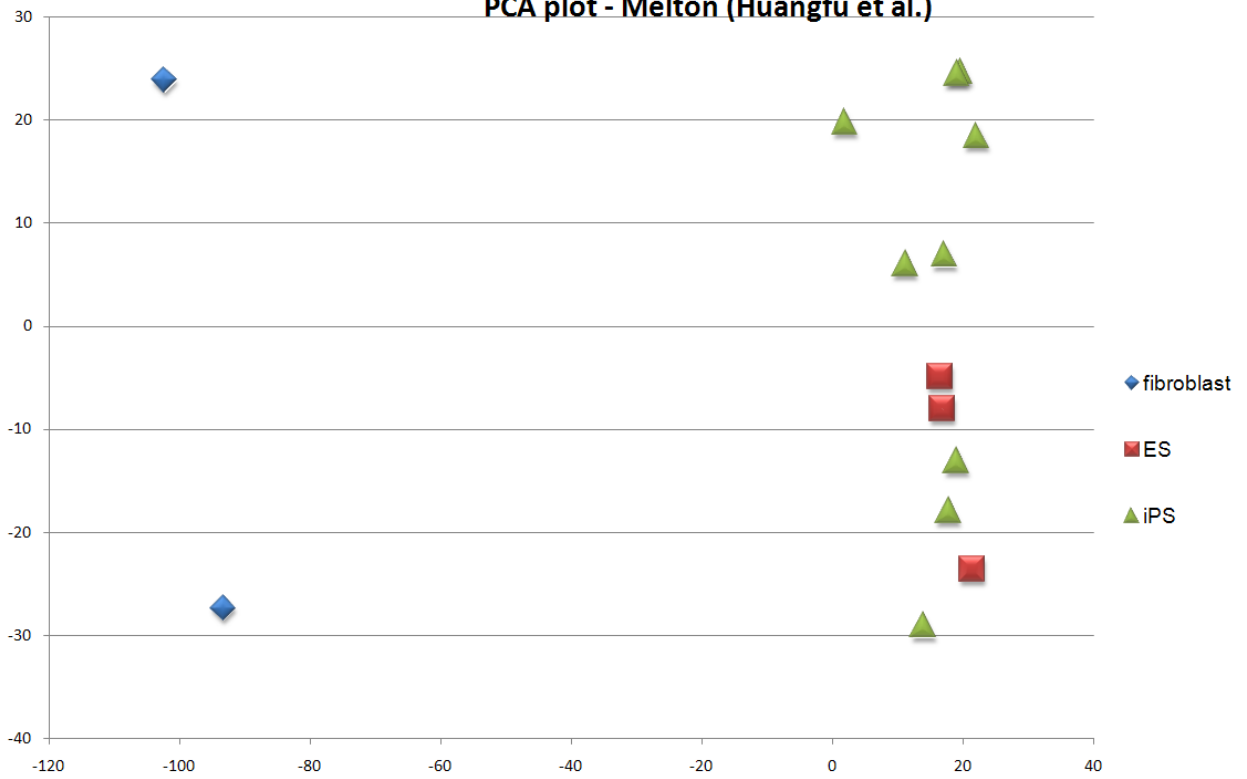

PCA plot - GSE15148

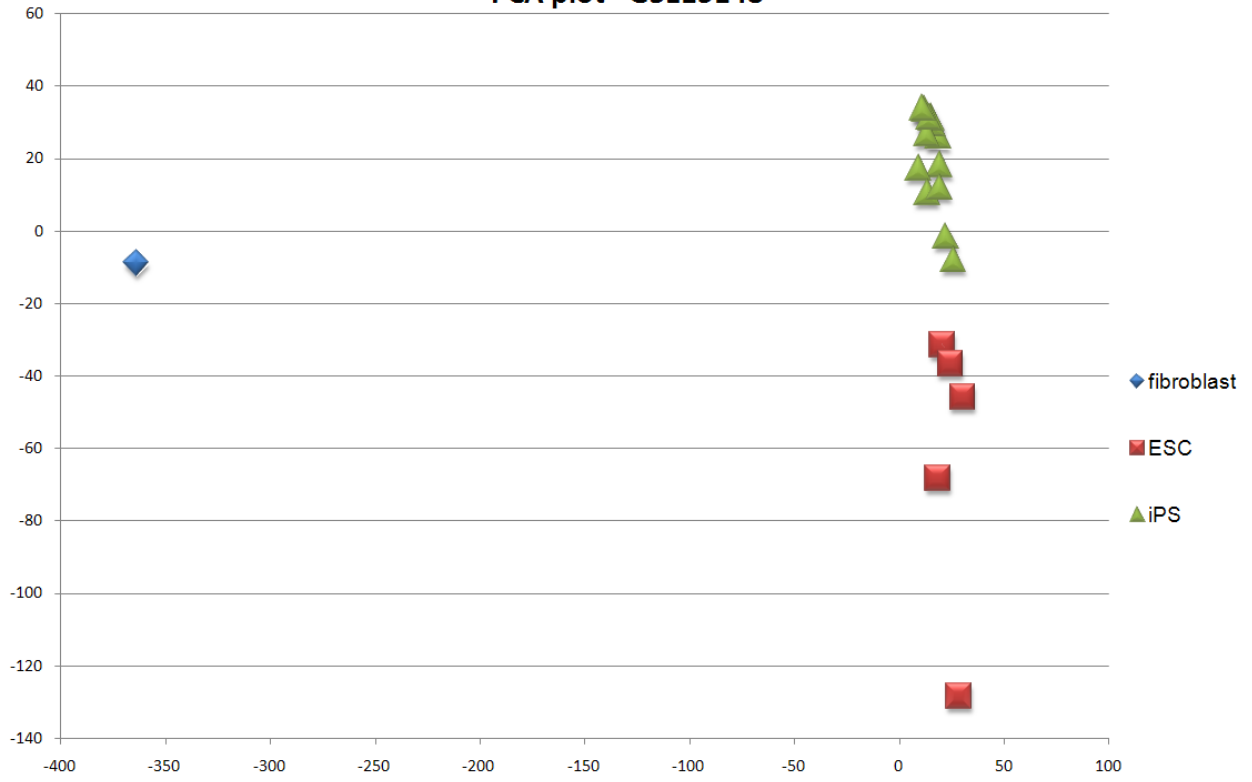

PCA plot - GSE13828

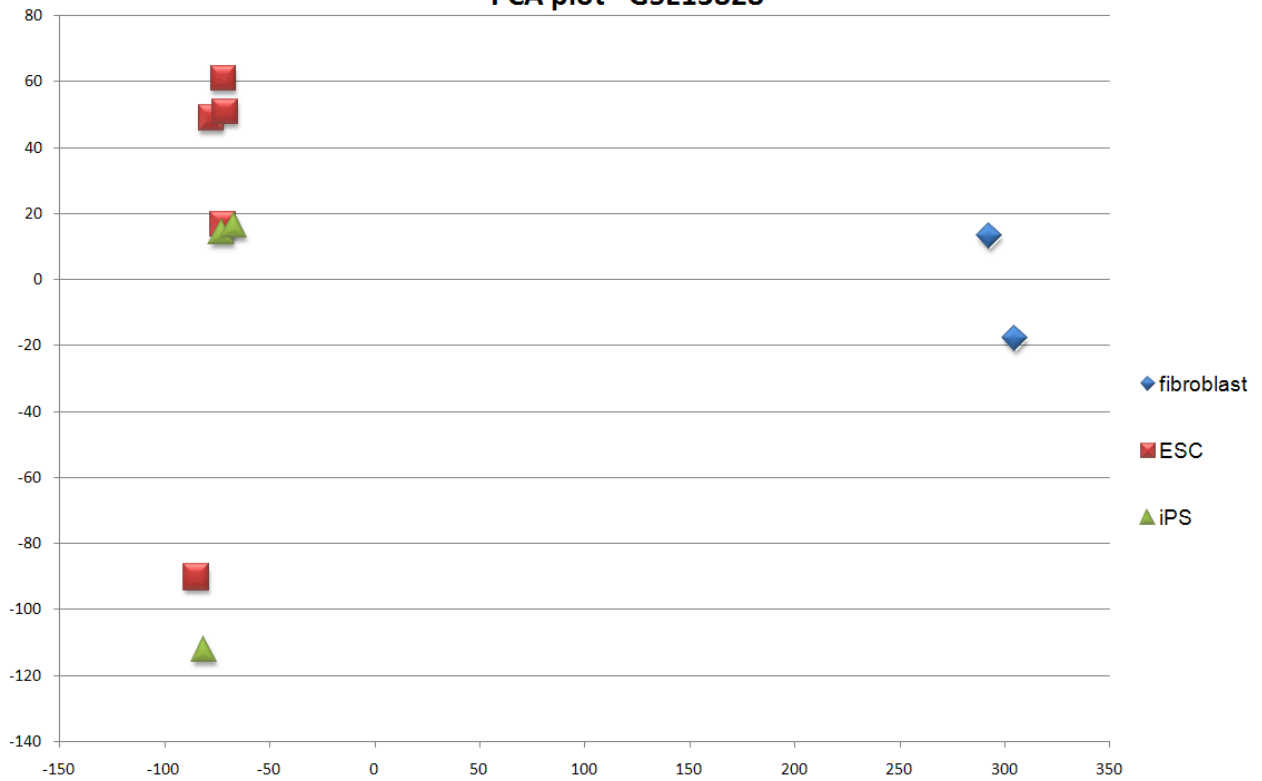

PCA plot - GSE12583

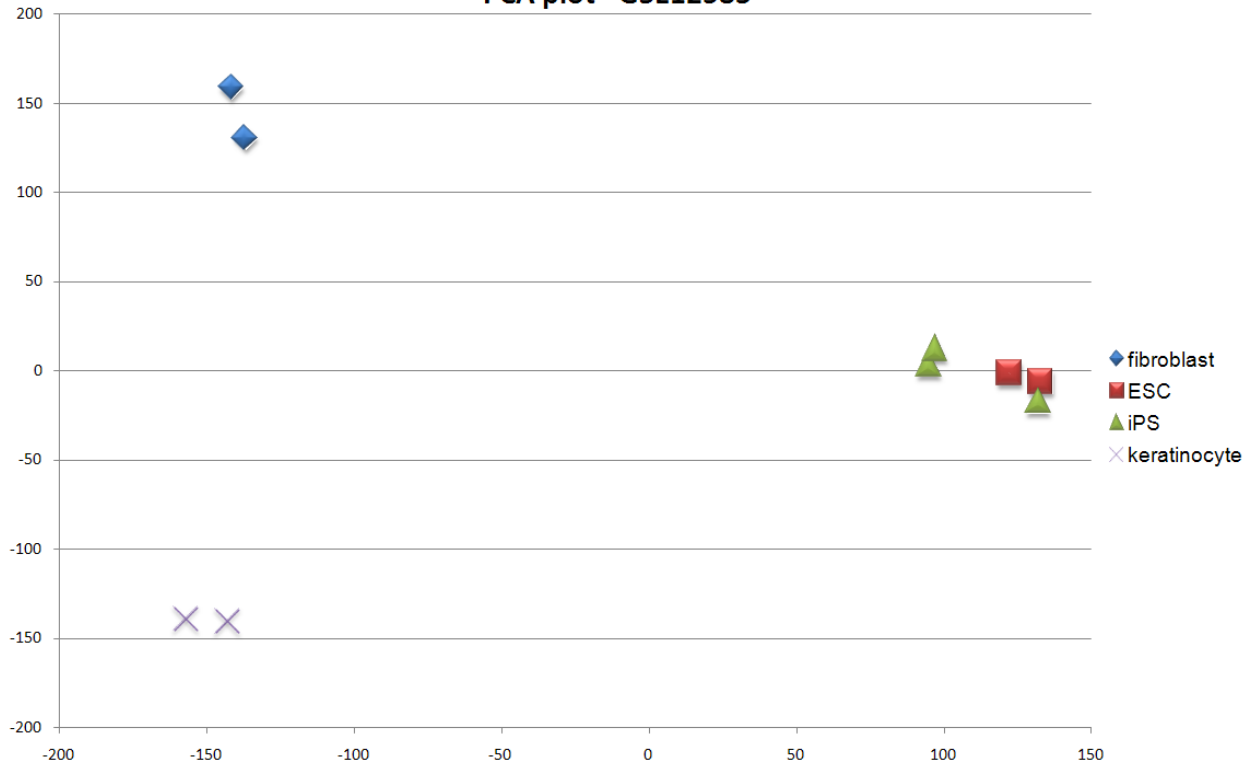

PCA plot - GSE9071

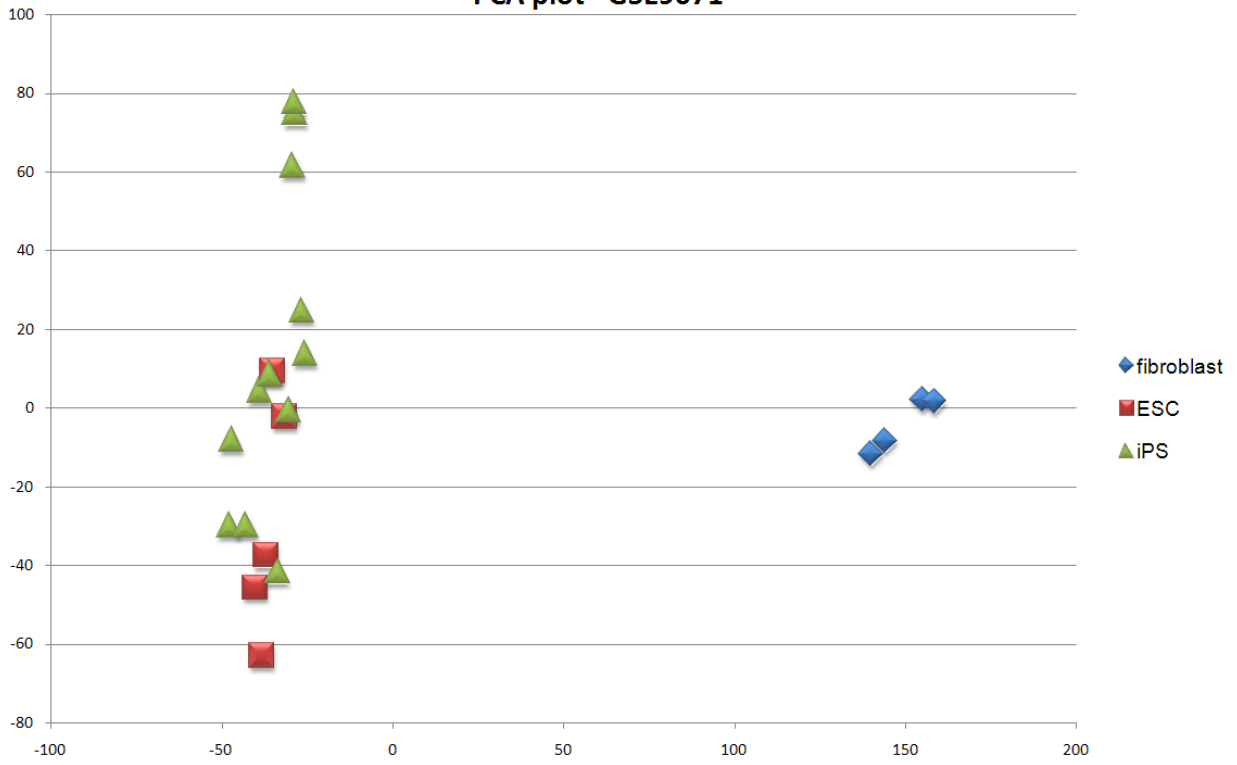

PCA plot - GSE14982

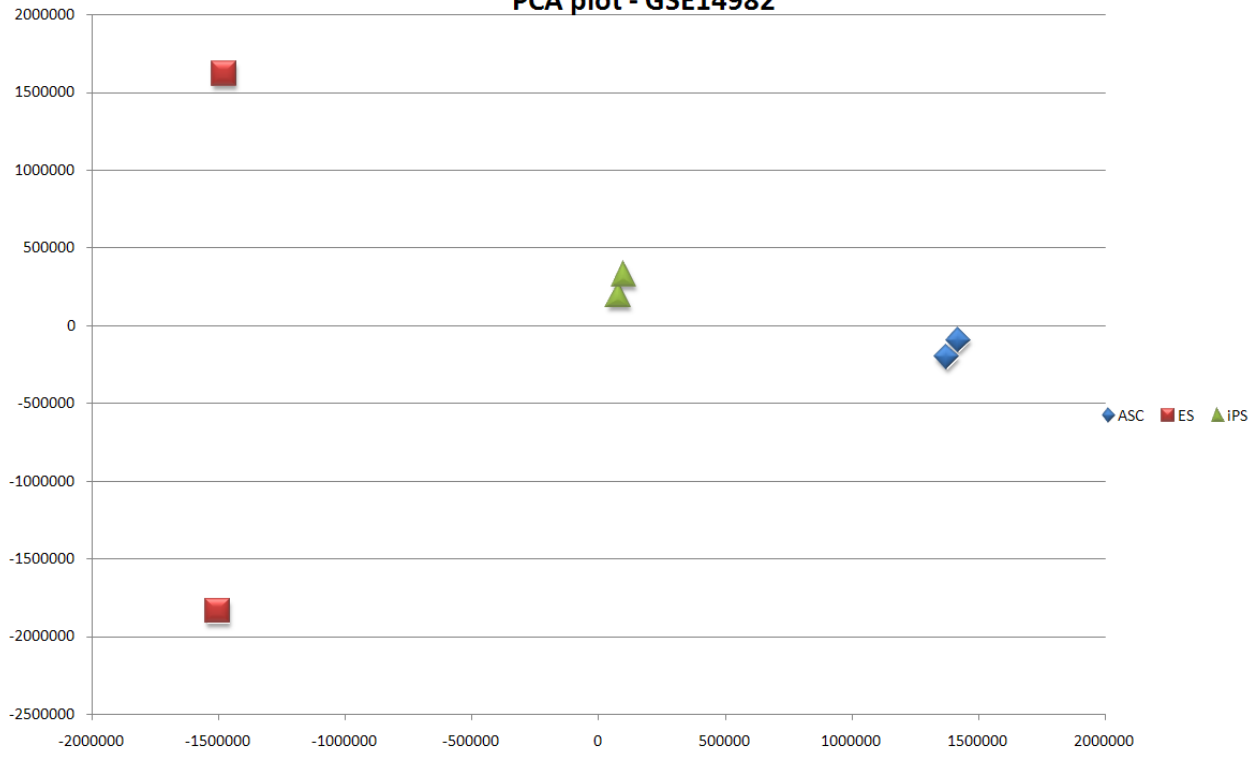

PCA plot - GSE12922

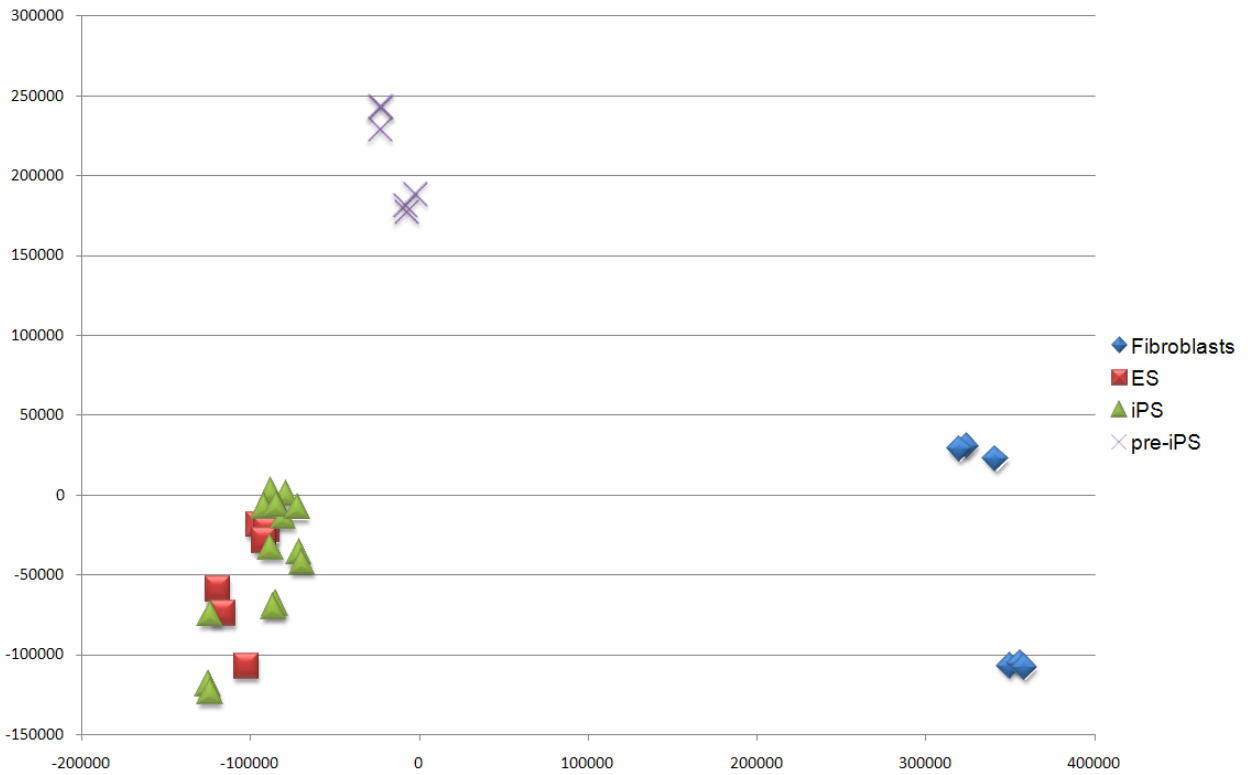

## B- Mouse datasets

### PCA plot - E-MEXP 1037

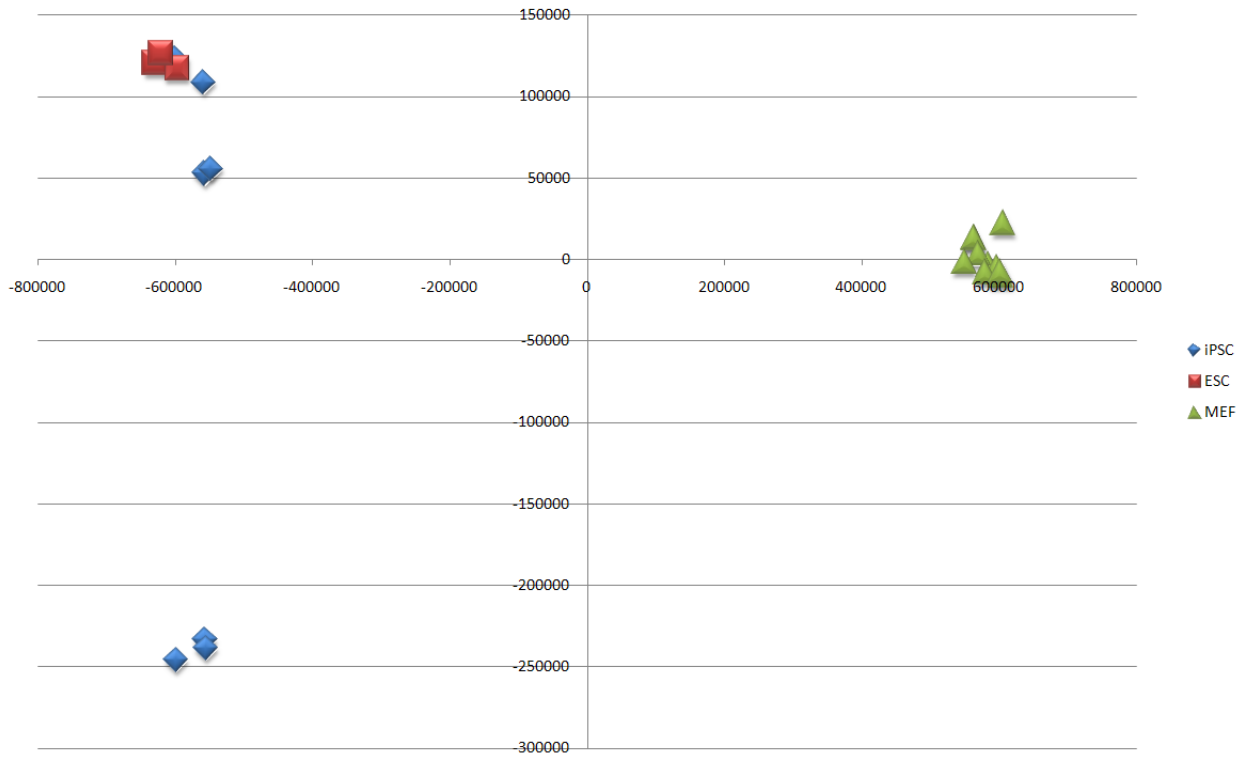

### PCA plot - GSE19023

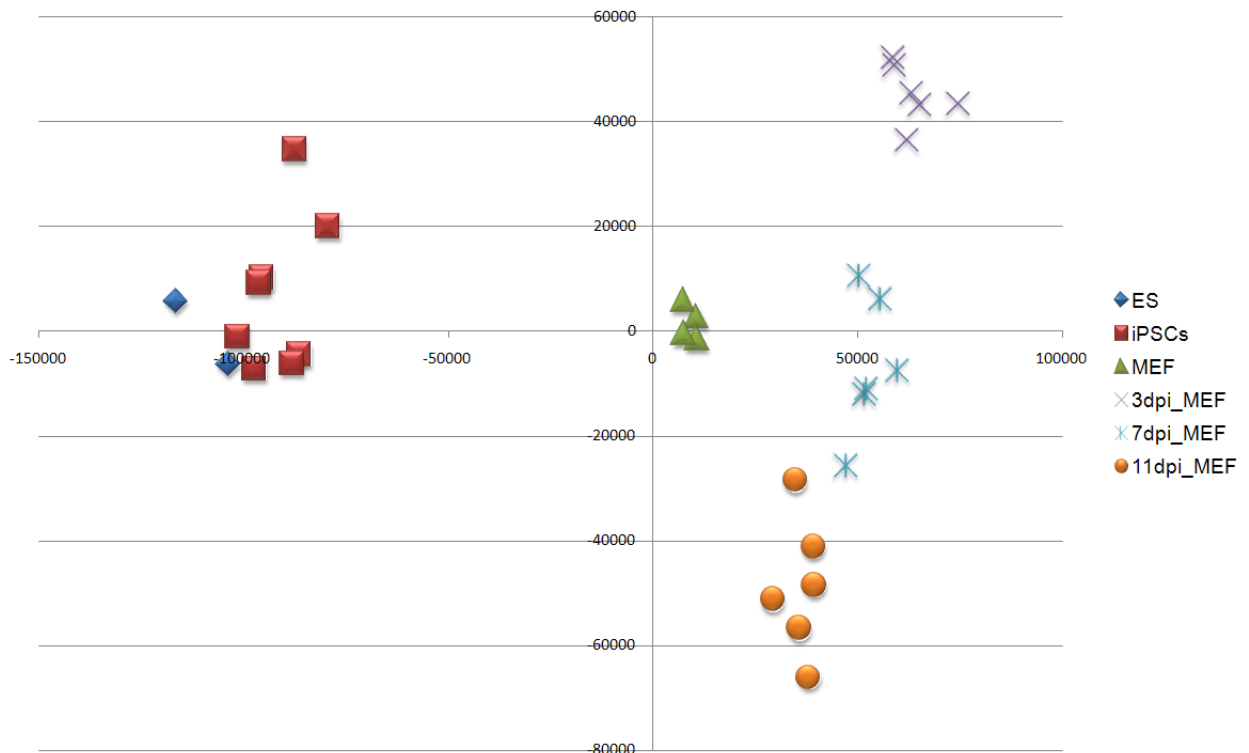

PCA plot - GSE5259

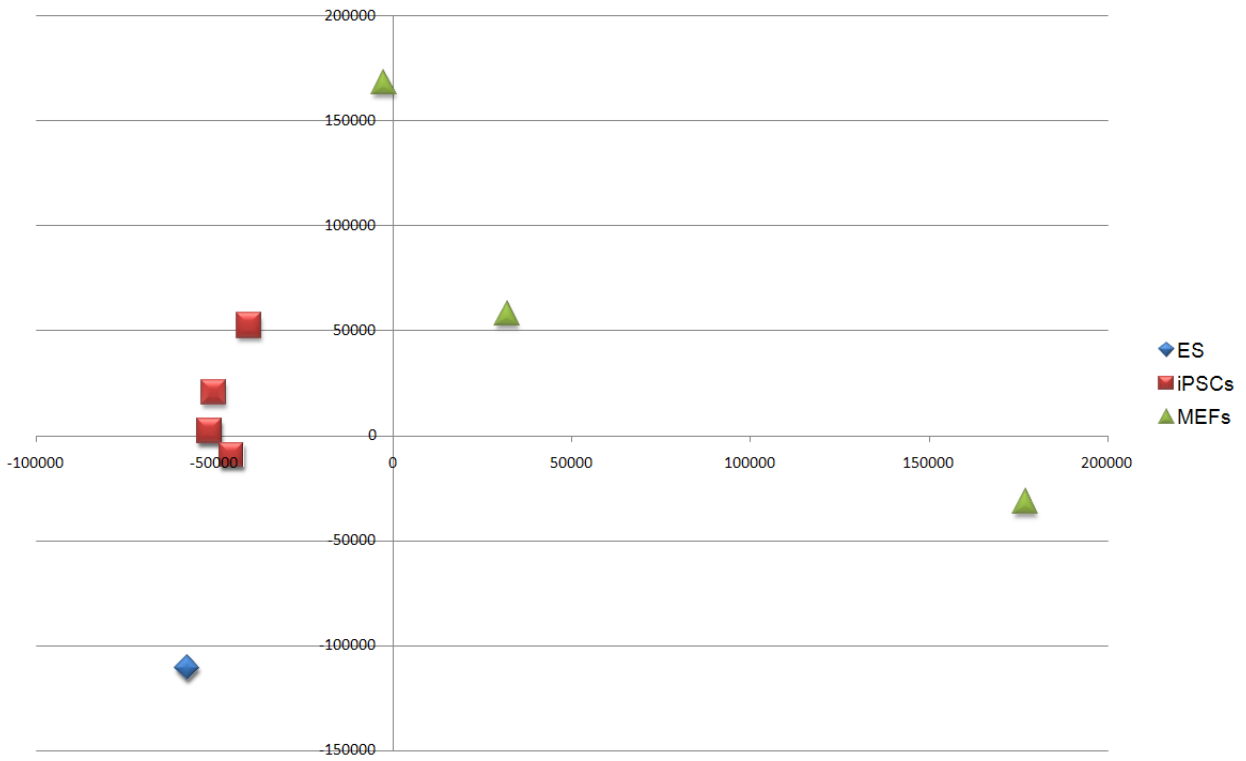

PCA plot - GSE7815

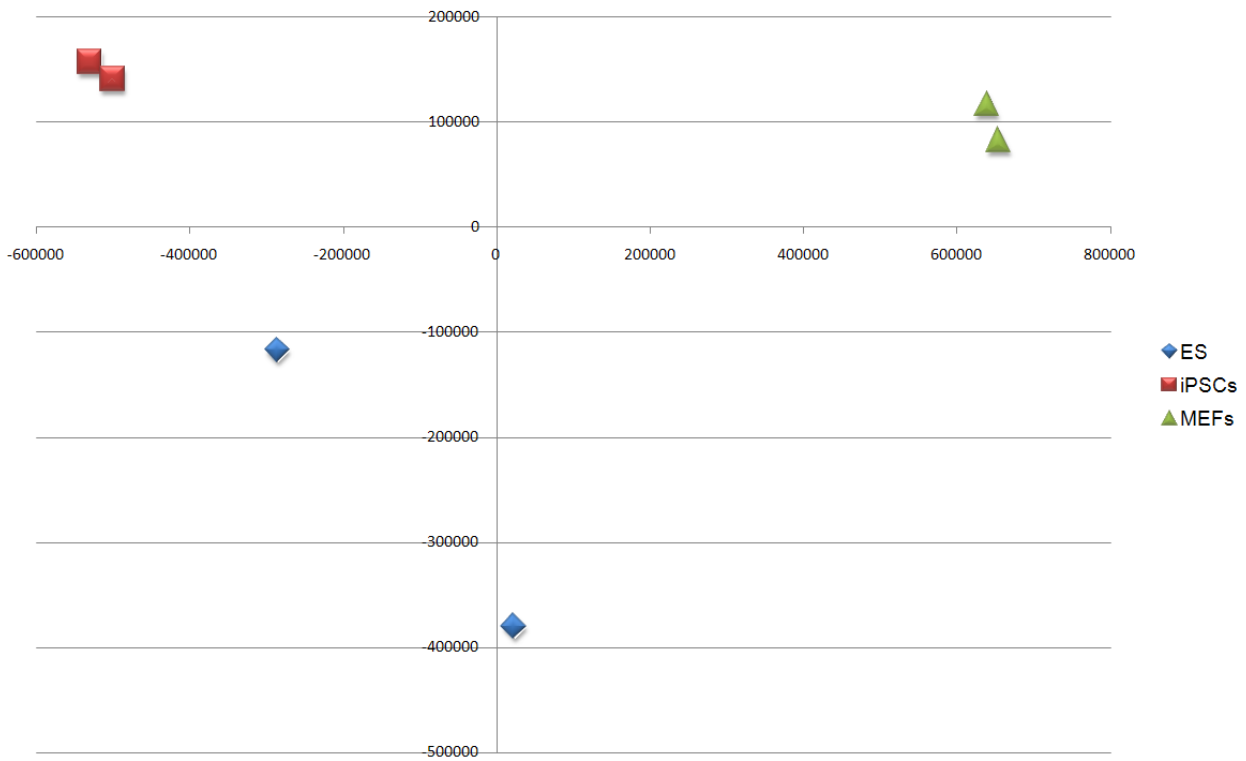



PCA plot - GSE7841

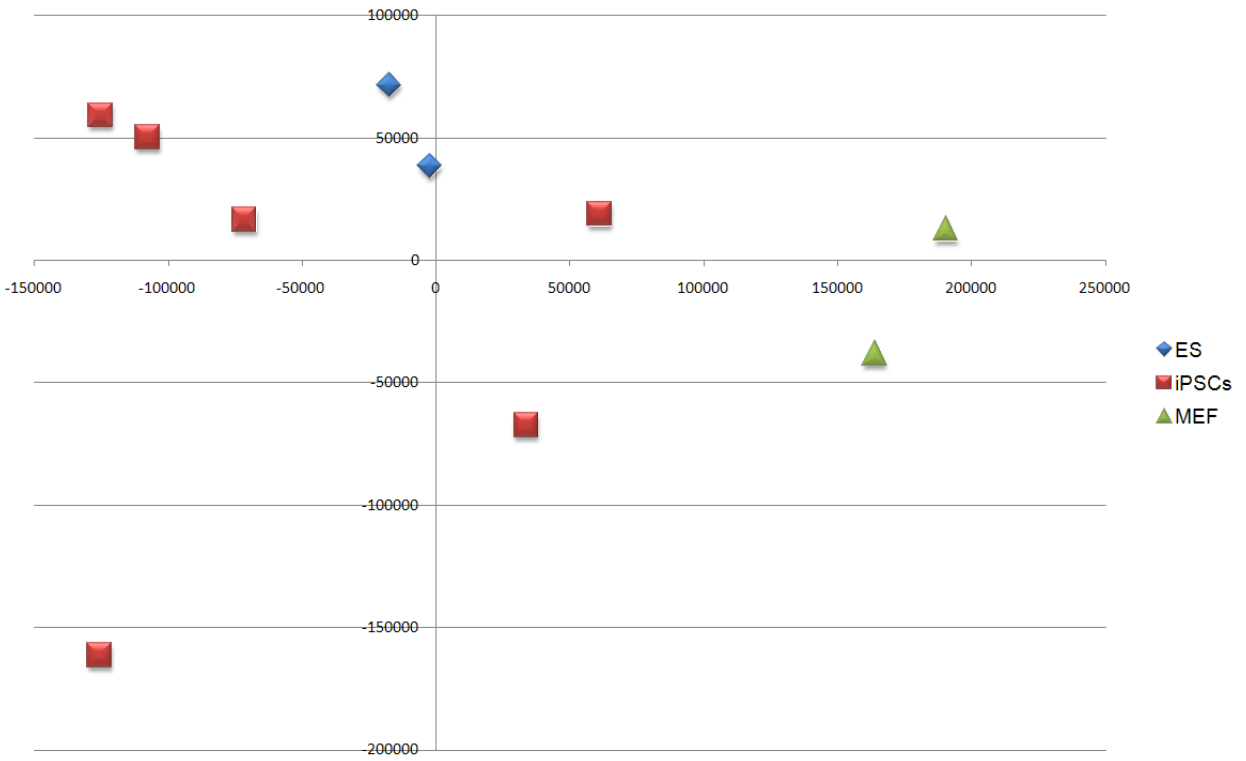

PCA plot - GSE8024

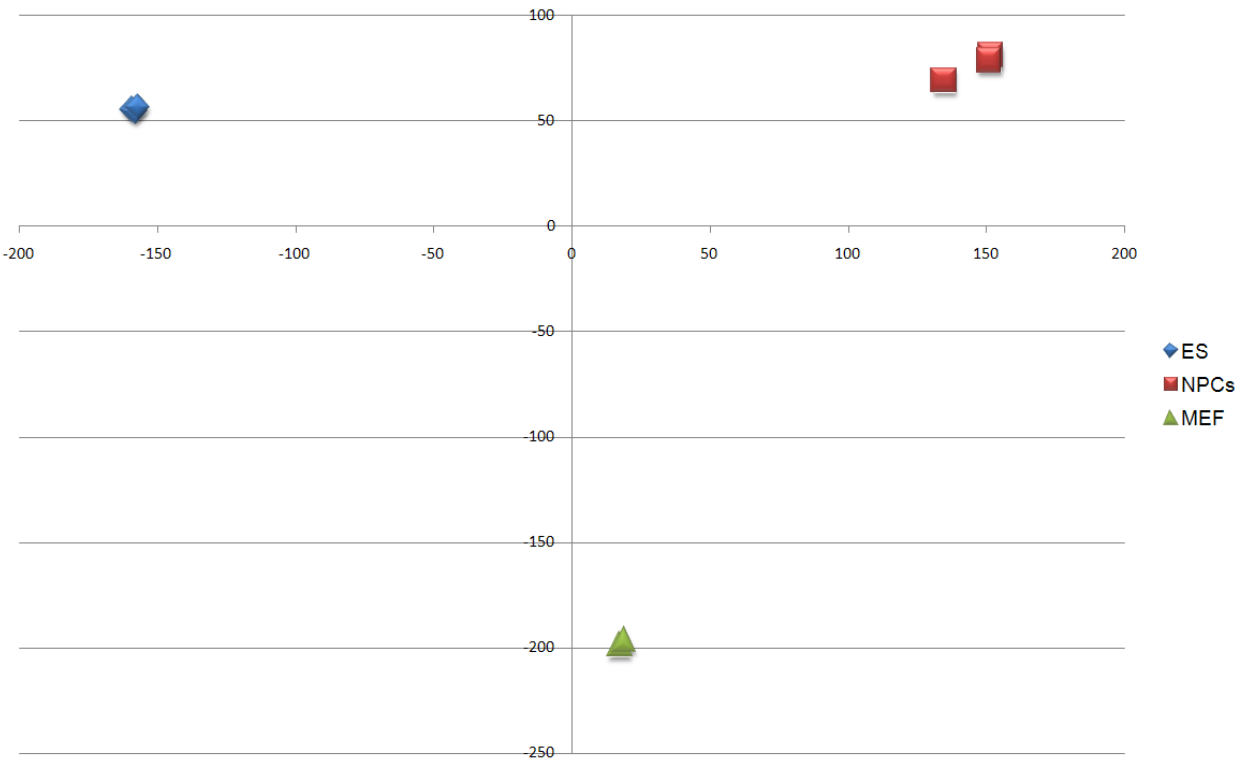

PCA plot - GSE13211

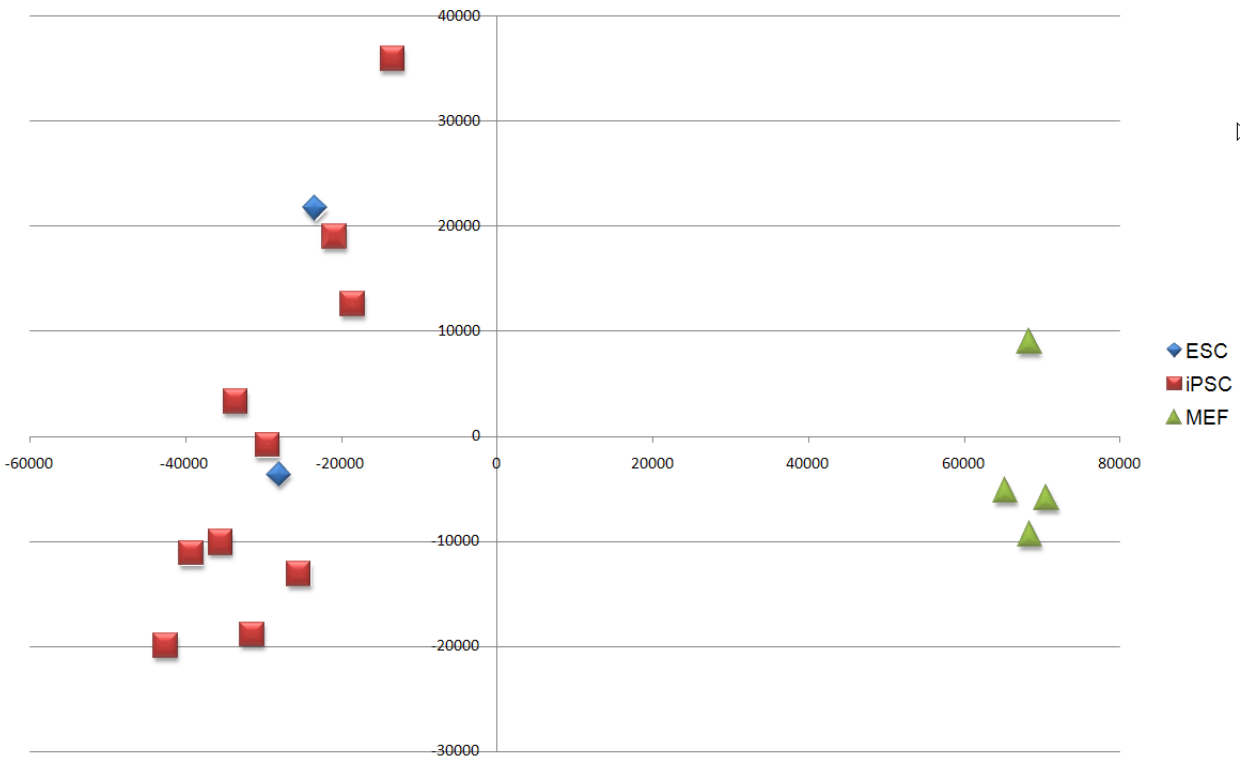

PCA plot - GSE13312

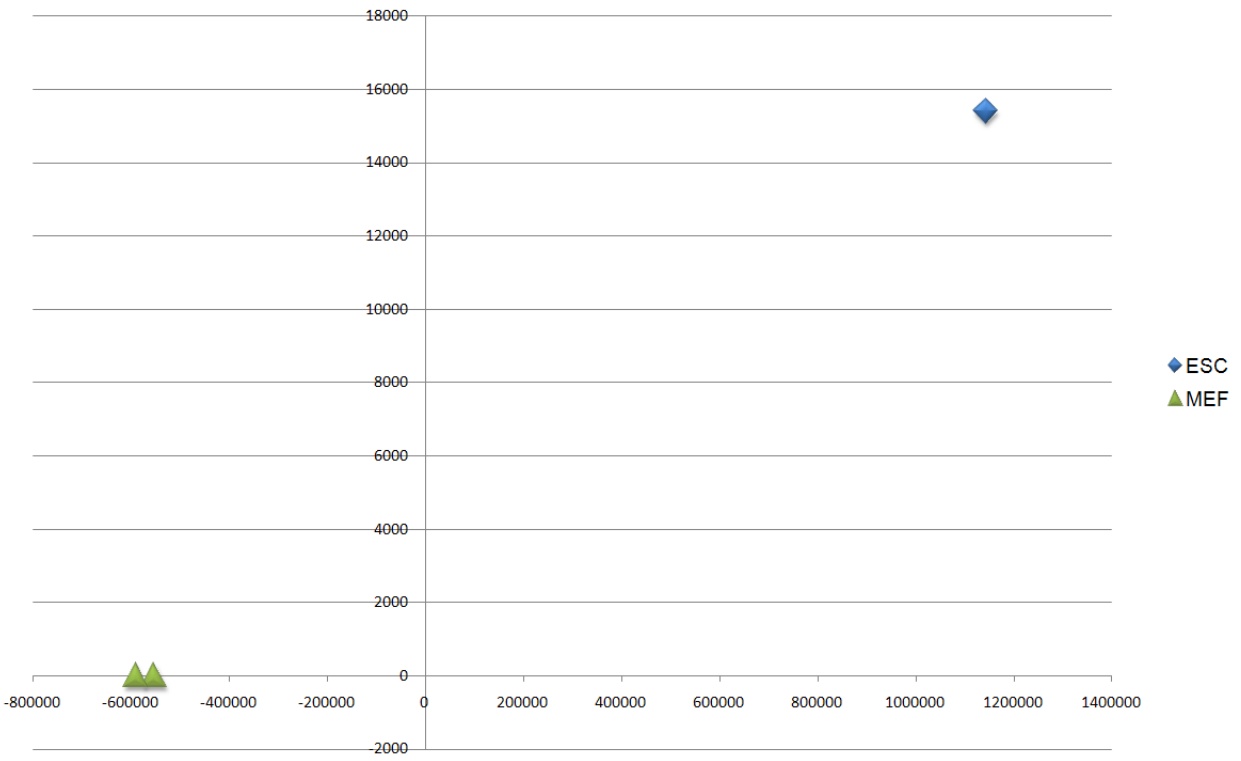

PCA plot - GSE14012

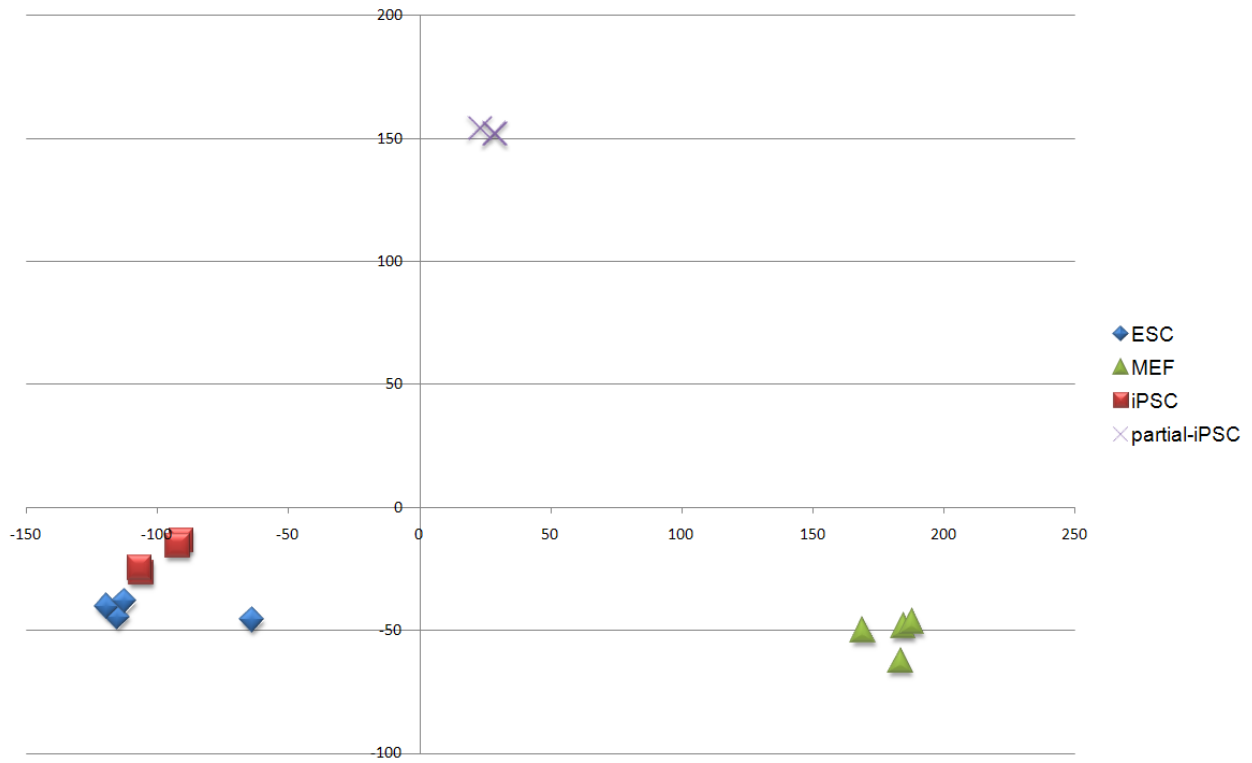

PCA plot - GSE15267

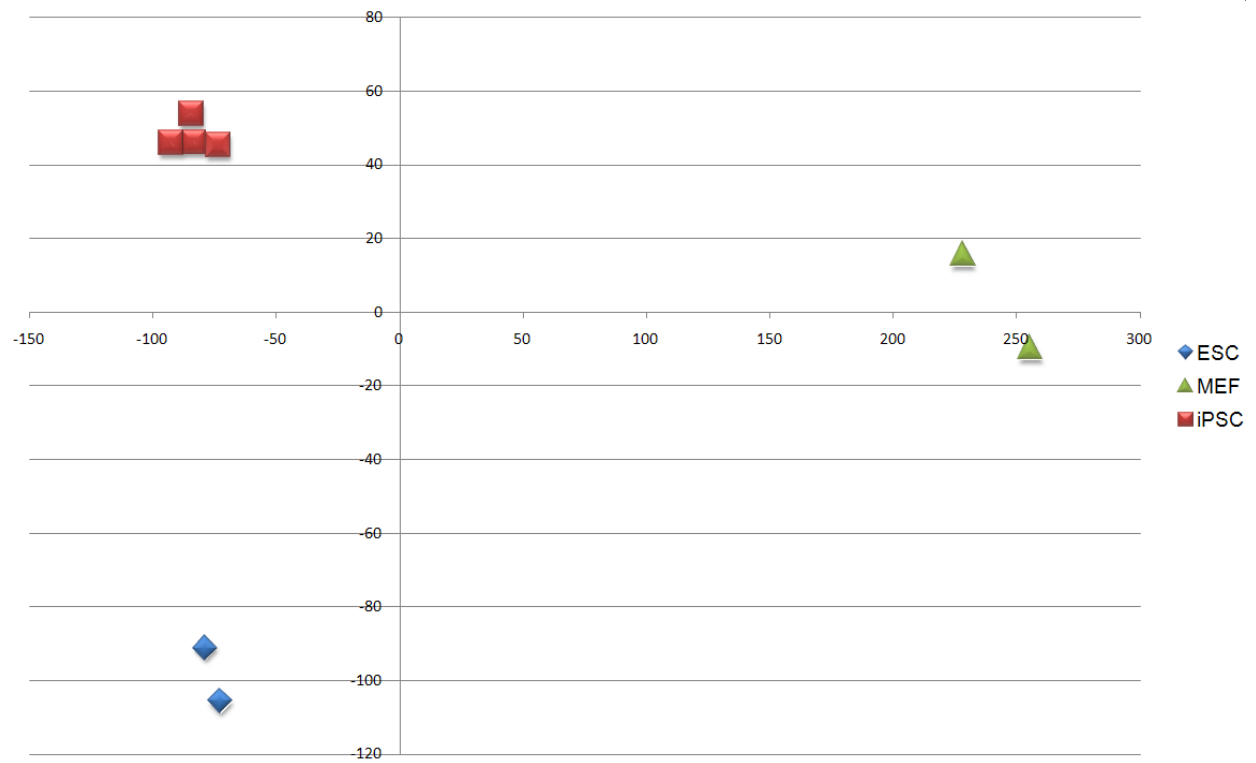

PCA plot - GSE16062

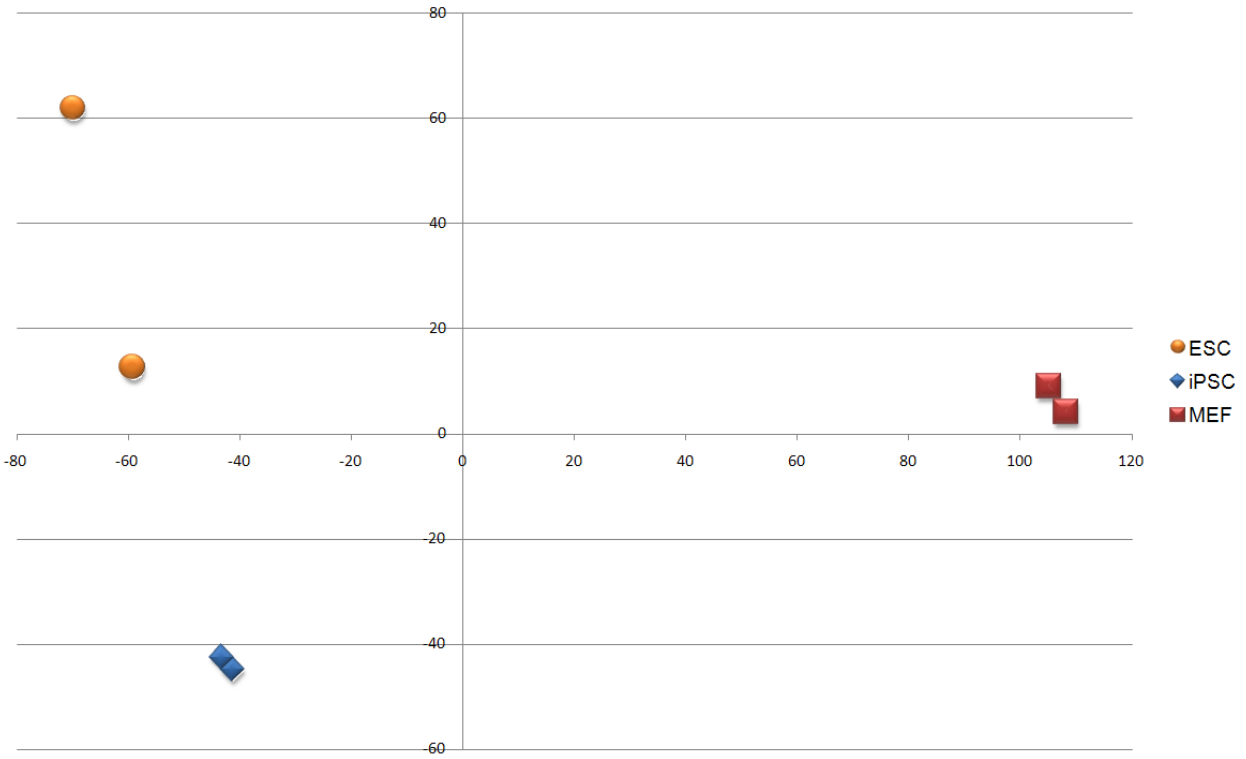

PCA plot - GSE17004

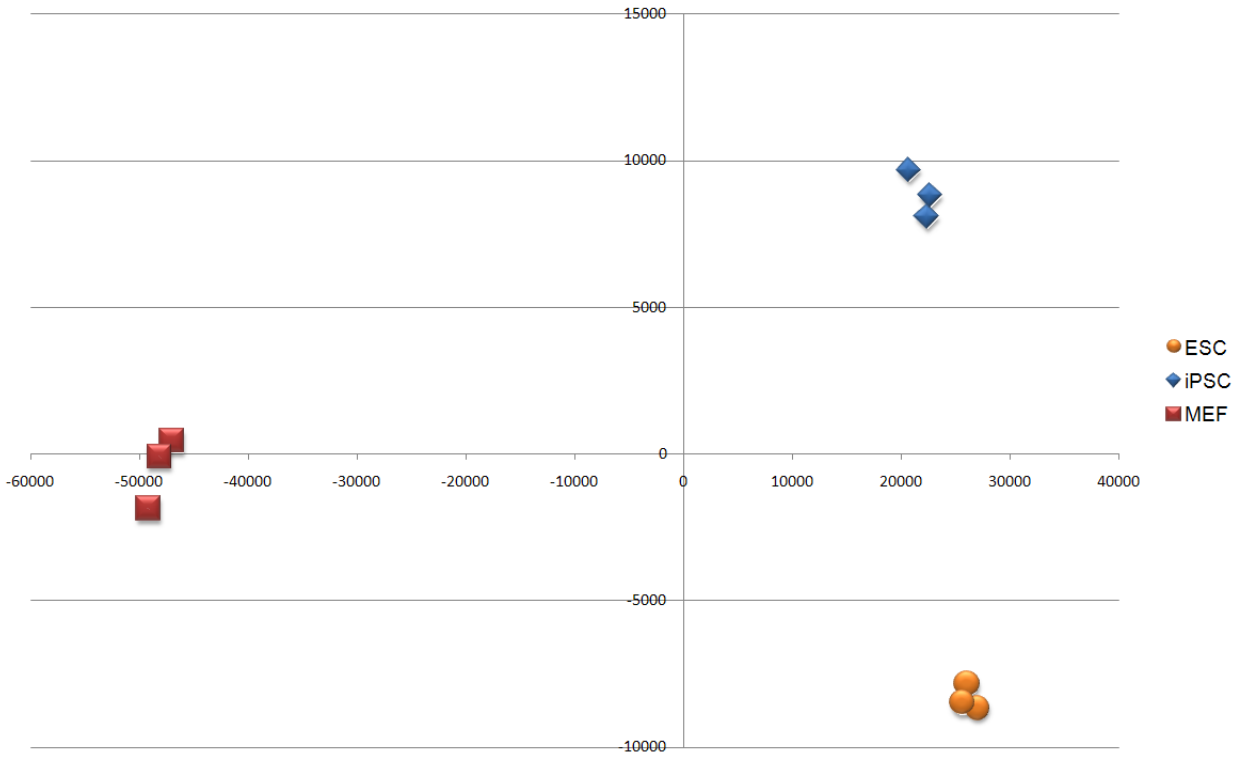

PCA plot - GSE18286

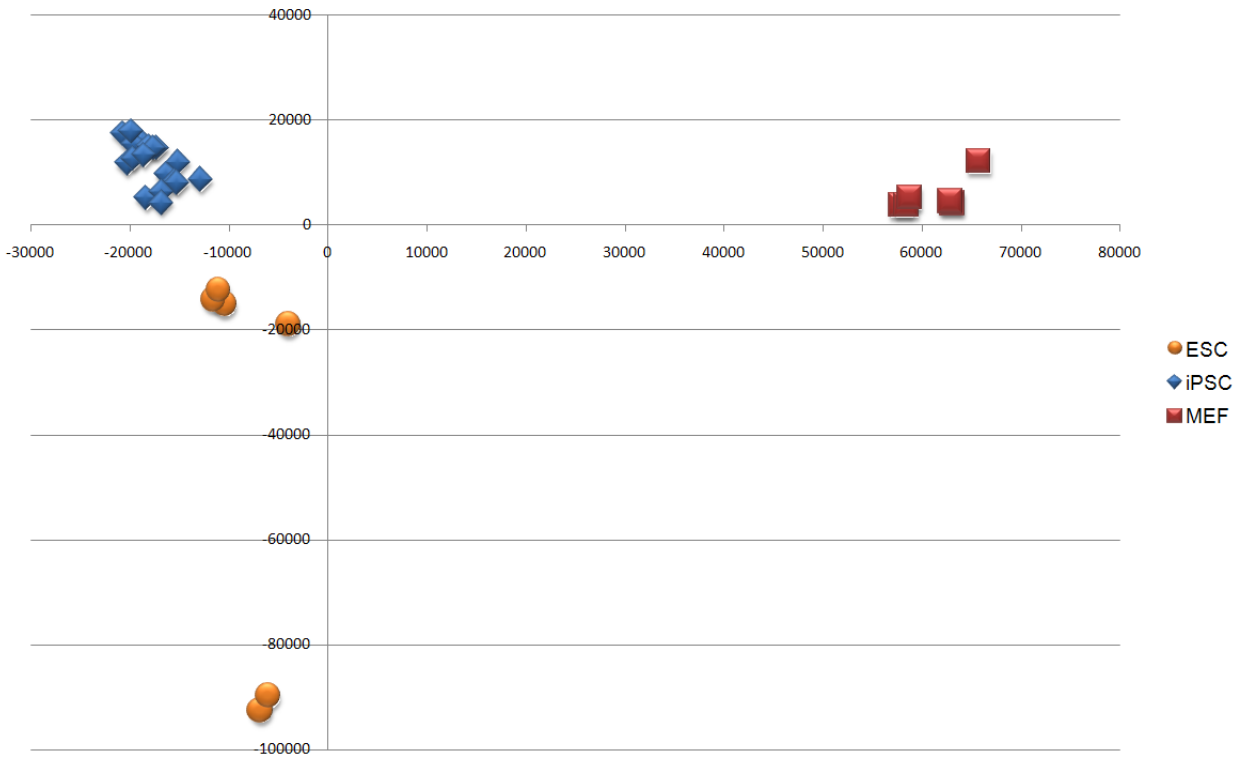

Supplement: pone.0012664.s005.pdf [file pone.0012664.s005.pdf]
