# Supplementary material for: Analysis of Human and Mouse Reprogramming of Somatic Cells to Induced Pluripotent Stem Cells. What Is in the Plate?
Source: PLoS One. 2010 Sep 17;5(9):e12664. doi: 10.1371/journal.pone.0012664 (PMC2941458; doi:10.1371/journal.pone.0012664)
Supplement: Figure S3 — Correlation coefficients of different samples and experiments on the profiles of 316 bivalent-domain-containing genes in Human. It is important to note that the profile hasn't been always done on the same platform, which explains why the correlation inter-experiments is sometimes not good. (0.14 MB PDF) [file pone.0012664.s004.pdf]

**Figure S3. Correlation coefficients of different samples and experiments on the profiles of 316 bivalent-domain-containing genes in Human.**

It is important to note that the profile hasn't been always done on the same platform, which explains why the correlation inter-experiments is sometimes not good.

[illegible]
