# Supplementary material for: Analysis of Human and Mouse Reprogramming of Somatic Cells to Induced Pluripotent Stem Cells. What Is in the Plate?
Source: PubMed Central journal article supplement (PMC2941458; doi:10.1371/journal.pone.0012664), 2010-09-17
Supplement: pone.0012664.s013.pdf [file pone.0012664.s013.pdf]

**Figure S12: List of tumor suppressor genes down-regulated and oncogenes upregulated in human iPSCs compared to ESCs**

List of tumor suppressor genes and oncogenes whose expression levels renders iPSCs suspicious

| hgnc symbol | gene class       | consensus dir fib-iPS | top 1000 in fib-iPS comparison | available fib-iPS comparisons | average rank in fib-iPS comparison | Fib-iPS top 1000 in n% exp available | consensus dir change fib-es | top 1000 in fib-es comparison | available fib-es comparisons | average rank in fib-es comparison | Fib-ES top 1000 in n% exp available | consensus dir change fib-preiPS | top 1000 in fib-part-iPS comparison | available fib-part-iPS comparisons | average rank in fib-part-iPS comparison | Fib-pre iPS top 1000 in n% exp available |
|-------------|------------------|-----------------------|--------------------------------|-------------------------------|------------------------------------|--------------------------------------|-----------------------------|-------------------------------|------------------------------|-----------------------------------|-------------------------------------|---------------------------------|-------------------------------------|------------------------------------|-----------------------------------------|------------------------------------------|
| LCK         | oncogene         | up in iPS             | 10                             | 13                            | 733                                | 77%                                  | up in ES                    | 8                             | 12                           | 1273                              | 67%                                 | up in pre-iPS                   | 0                                   | 2                                  | 4319                                    | 0%                                       |
| MYCN        | oncogene         | up in iPS             | 11                             | 13                            | 734                                | 85%                                  | up in ES                    | 9                             | 12                           | 1031                              | 75%                                 | up in pre-iPS                   | 0                                   | 2                                  | 6145                                    | 0%                                       |
| MSH2        | oncogene         | up in iPS             | 4                              | 12                            | 1103                               | 33%                                  | up in ES                    | 3                             | 11                           | 1475                              | 27%                                 | up in pre-iPS                   | 1                                   | 2                                  | 1058                                    | 50%                                      |
| FGFR2       | oncogene         | up in iPS             | 9                              | 12                            | 1753                               | 75%                                  | up in ES                    | 9                             | 11                           | 2204                              | 82%                                 | up in pre-iPS                   | 1                                   | 1                                  | 173                                     | 100%                                     |
| MYCL1       | oncogene         | up in iPS             | 4                              | 13                            | 3501                               | 31%                                  | up in ES                    | 2                             | 12                           | 3600                              | 17%                                 | up in pre-iPS                   | 0                                   | 2                                  | 5847                                    | 0%                                       |
| TIAM1       | oncogene         | up in iPS             | 7                              | 12                            | 3521                               | 58%                                  | up in ES                    | 6                             | 11                           | 4230                              | 55%                                 | up in pre-iPS                   | 1                                   | 1                                  | 698                                     | 100%                                     |
| PIM1        | oncogene         | up in iPS             | 2                              | 12                            | 4556                               | 17%                                  | up in ES                    | 1                             | 11                           | 5104                              | 9%                                  | down in pre-iPS                 | 0                                   | 1                                  | 6665                                    | 0%                                       |
| PMS1        | oncogene         | up in iPS             | 0                              | 13                            | 5064                               | 0%                                   | up in ES                    | 0                             | 12                           | 5227                              | 0%                                  | up in pre-iPS                   | 0                                   | 2                                  | 3464                                    | 0%                                       |
| KRAS        | oncogene         | up in iPS             | 0                              | 13                            | 5575                               | 0%                                   | up in ES                    | 2                             | 12                           | 5155                              | 17%                                 | ambiguous                       | 0                                   | 2                                  | 3168                                    | 0%                                       |
| TERT        | oncogene         | up in iPS             | 1                              | 13                            | 6014                               | 8%                                   | up in ES                    | 1                             | 12                           | 5788                              | 8%                                  | up in pre-iPS                   | 0                                   | 2                                  | 3883                                    | 0%                                       |
| KIT         | oncogene         | up in iPS             | 2                              | 13                            | 6028                               | 15%                                  | up in ES                    | 3                             | 12                           | 5132                              | 25%                                 | down in pre-iPS                 | 0                                   | 2                                  | 3997                                    | 0%                                       |
| FGF4        | oncogene         | up in iPS             | 1                              | 13                            | 6046                               | 8%                                   | up in ES                    | 1                             | 12                           | 5972                              | 8%                                  | ambiguous                       | 0                                   | 2                                  | 8637                                    | 0%                                       |
| CDKN2A      | tumor suppressor | down in iPS           | 3                              | 12                            | 5043                               | 25%                                  | down in ES                  | 3                             | 11                           | 4950                              | 27%                                 | up in pre-iPS                   | 0                                   | 1                                  | 8097                                    | 0%                                       |
| PTEN        | tumor suppressor | down in iPS           | 0                              | 13                            | 5143                               | 0%                                   | down in ES                  | 0                             | 12                           | 6158                              | 0%                                  | ambiguous                       | 0                                   | 2                                  | 6435                                    | 0%                                       |
| NF2         | tumor suppressor | down in iPS           | 1                              | 13                            | 5562                               | 8%                                   | down in ES                  | 0                             | 12                           | 5768                              | 0%                                  | down in pre-iPS                 | 0                                   | 2                                  | 5318                                    | 0%                                       |
| RB1         | tumor suppressor | down in iPS           | 0                              | 13                            | 5939                               | 0%                                   | down in ES                  | 0                             | 12                           | 5012                              | 0%                                  | down in pre-iPS                 | 0                                   | 2                                  | 7469                                    | 0%                                       |

of being more tumor-prone than ESCs
